# Supplementary material for: Circulating Cell-Free DNA Assessment in Biofluids from Children with Neuroblastoma Demonstrates Feasibility and Potential for Minimally Invasive Molecular Diagnostics
Source: MDPI journal article supplement (doi:10.3390/cancers14092080), 2022-04-21
Supplement: s1 [file s1]

# Circulating Cell-Free DNA Assessment in Biofluids from Children with Neuroblastoma Demonstrates Feasibility and Potential for Minimally Invasive Molecular Diagnostics

Marco Lodrini, Jasmin Wünschel, Theresa M. Thole-Kliesch, Maddalena Grimaldi, Annika Sprüssel, Rasmus B. Linke, Jan F. Hollander, Daniela Tiburtius, Annette Künkele, Johannes H. Schulte, Erwin Lankes, Thomas Elgeti, Patrick Hundsdörfer, Kathy Astrahantseff, Thorsten Simon, Angelika Eggert and Hedwig E. Deubzer

## SUPPLEMENTARY TABLES

**Table S1.** Patient and tumor characteristics in the high-risk neuroblastoma study subpopulation.

| Factor                   | No. of patients | % of study population |
|--------------------------|-----------------|-----------------------|
| Sex                      |                 |                       |
| male                     | 32              | 64                    |
| female                   | 18              | 36                    |
| Age at diagnosis         |                 |                       |
| < 18 months              | 14              | 28                    |
| ≥ 18 months              | 36              | 72                    |
| MYCN status <sup>1</sup> |                 |                       |
| diploid                  | 25              | 50                    |
| amplified                | 25              | 50                    |
| 1p36 status <sup>2</sup> |                 |                       |
| no aberration            | 23              | 46                    |
| aberration               | 24              | 48                    |
| not available            | 3               | 6                     |
| ALK status <sup>3</sup>  |                 |                       |
| wildtype                 | 20              | 40                    |
| gain                     | 2               | 4                     |
| mutation                 | 15              | 30                    |
| not available            | 13              | 26                    |
| Overall survival status  |                 |                       |
| alive                    | 33              | 66                    |
| succumbed to disease     | 15              | 30                    |
| died of other causes     | 2               | 4                     |

<sup>1</sup> Genomic copies of the *MYCN* oncogene as analyzed by fluorescence in situ hybridization, Southern blot and hybrid capture-based panel sequencing. *MYCN* amplification was defined as >8 genomic copies. <sup>2</sup> Genomic status of the chromosome 1p36 region as analyzed by fluorescence in situ hybridization and PCR. <sup>3</sup> *ALK* status as analyzed by hybrid capture-based panel sequencing.

## SUPPLEMENTARY FIGURES

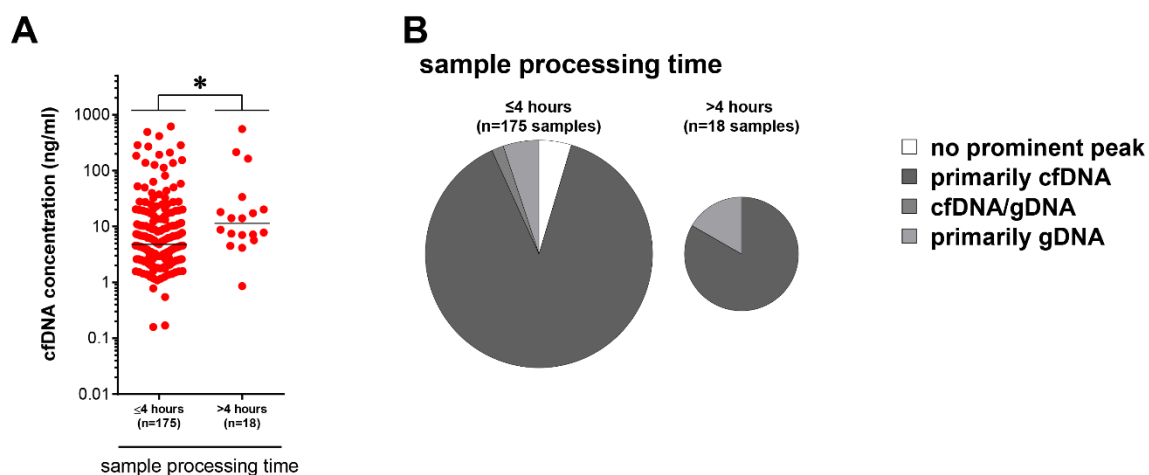

**Figure S1.** Influence of sample processing time on blood-based DNA characteristics. (A) DNA extracted from blood plasma was analyzed using the cell-free DNA ScreenTape assay (Agilent) and the Agilent 4200 TapeStation System. Each symbol depicts an individual measurement. Data are categorized into two different subgroups dependent of the sample processing time. \* $P < 0.05$ . (B) Piecharts demonstrating the distribution of electropherogram profiles characterized by (i) no prominent peak, (ii) primarily cfDNA, (iii) similar amounts of cfDNA and high molecular weight genomic DNA and (iv) primarily high molecular weight genomic DNA. Data are categorized into two different subgroups dependent of the sample processing time.
